# Supplementary material
Source: ML conference proceedings conference paper supplement (https://openaccess.thecvf.com/content/CVPR2023/html/Tascon-Morales_Logical_Implications_for_CVPR_2023_paper.html)
Supplement: Supplementary file 1 [file Tascon-Morales_Logical_Implications_for_CVPR_2023_supplemental.pdf]

# Supplementary Material

## Logical Implications for Visual Question Answering Consistency

Sergio Tascon-Morales Pablo Márquez-Neila Raphael Sznitman  
University of Bern

{sergio.tasconmorales, pablo.marquez, raphael.sznitman}@unibe.ch

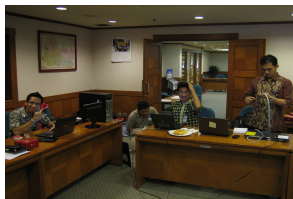

Ground Truth

| Question 1     | Ans. 1 | Relation | Question 2                          | Ans. 2 |
|----------------|--------|----------|-------------------------------------|--------|
| Is it a party? | No     | ←        | Do the people appear to be at work? | Yes    |

Ans. None: Yes 🚨  
Ans. SQuINT: Yes 🚨  
Ans. CP-VQA: Yes 🚨  
Ans. Ours: No

Ans. None: Yes  
Ans. SQuINT: Yes  
Ans. CP-VQA: Yes  
Ans. Ours: Yes

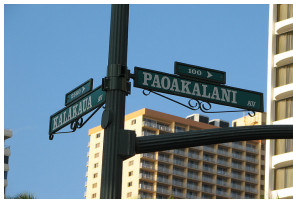

Ground Truth

| Question 1        | Ans. 1 | Relation | Question 2                   | Ans. 2 |
|-------------------|--------|----------|------------------------------|--------|
| Is the sky clear? | Yes    | ↔        | Are there clouds in the sky? | No     |

Ans. None: Yes  
Ans. SQuINT: Yes  
Ans. CP-VQA: Yes  
Ans. Ours: Yes

Ans. None: Yes 🚨  
Ans. SQuINT: Yes 🚨  
Ans. CP-VQA: Yes 🚨  
Ans. Ours: No

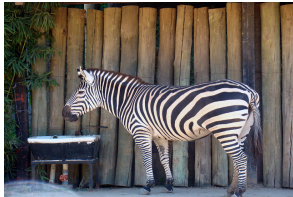

Ground Truth

| Question 1                   | Ans. 1 | Relation | Question 2                         | Ans. 2 |
|------------------------------|--------|----------|------------------------------------|--------|
| Is this animal in captivity? | Yes    | ←        | Is there a fence behind the zebra? | Yes    |

Ans. None: Yes  
Ans. SQuINT: No 🚨  
Ans. CP-VQA: Yes  
Ans. Ours: No 🚨

Ans. None: Yes  
Ans. SQuINT: Yes  
Ans. CP-VQA: Yes  
Ans. Ours: Yes

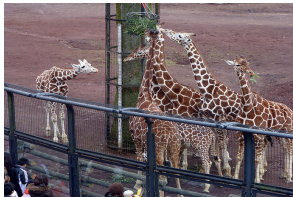

Ground Truth

| Question 1                     | Ans. 1 | Relation | Question 2                      | Ans. 2 |
|--------------------------------|--------|----------|---------------------------------|--------|
| Is one of the giraffes a baby? | Yes    | →        | Are all of the giraffes adults? | No     |

Ans. None: Yes  
Ans. SQuINT: Yes  
Ans. CP-VQA: Yes  
Ans. Ours: Yes

Ans. None: Yes 🚨  
Ans. SQuINT: No  
Ans. CP-VQA: Yes 🚨  
Ans. Ours: No

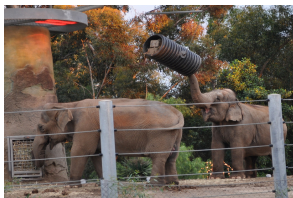

Ground Truth

| Question 1                | Ans. 1 | Relation | Question 2                   | Ans. 2 |
|---------------------------|--------|----------|------------------------------|--------|
| Are these elephants wild? | No     | ←        | Are the elephants fenced in? | Yes    |

Ans. None: No  
Ans. SQuINT: Yes 🚨  
Ans. CP-VQA: No  
Ans. Ours: No

Ans. None: Yes  
Ans. SQuINT: Yes  
Ans. CP-VQA: Yes  
Ans. Ours: Yes

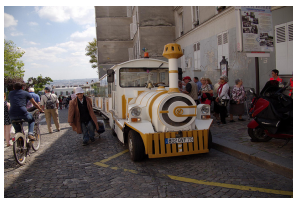

Ground Truth

| Question 1                 | Ans. 1 | Relation | Question 2                      | Ans. 2 |
|----------------------------|--------|----------|---------------------------------|--------|
| Is the trolley overloaded? | No     | ←        | Is the trolley normally loaded? | Yes    |

Ans. None: Yes 🚨  
Ans. SQuINT: Yes 🚨  
Ans. CP-VQA: No  
Ans. Ours: Yes 🚨

Ans. None: Yes  
Ans. SQuINT: Yes  
Ans. CP-VQA: Yes  
Ans. Ours: Yes

Figure 1. Additional qualitative examples from the Introspect dataset using BAN as backbone. Red siren symbols indicate inconsistent cases.

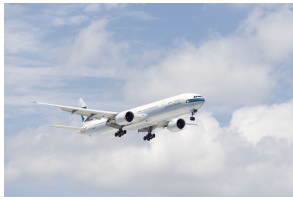

Ground Truth

| Question 1     | Ans. 1 | Relation | Question 2   | Ans. 2 |
|----------------|--------|----------|--------------|--------|
| Is it evening? | No     | ←        | Is it sunny? | Yes    |

Ans. None: Yes 🚨  
 Ans. SQuINT: Yes 🚨  
 Ans. CP-VQA: Yes 🚨  
 Ans. Ours: No

Ans. None: Yes  
 Ans. SQuINT: Yes  
 Ans. CP-VQA: Yes  
 Ans. Ours: Yes

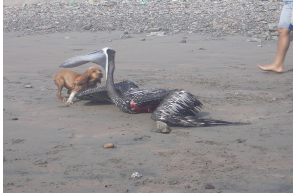

Ground Truth

| Question 1                             | Ans. 1 | Relation | Question 2                  | Ans. 2 |
|----------------------------------------|--------|----------|-----------------------------|--------|
| Is the dog being friendly to the bird? | Yes    | →        | Is the dog biting the bird? | No     |

Ans. None: Yes  
 Ans. SQuINT: Yes  
 Ans. CP-VQA: Yes  
 Ans. Ours: Yes

Ans. None: Yes 🚨  
 Ans. SQuINT: No  
 Ans. CP-VQA: Yes 🚨  
 Ans. Ours: No

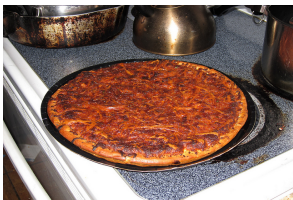

Ground Truth

| Question 1               | Ans. 1 | Relation | Question 2                      | Ans. 2 |
|--------------------------|--------|----------|---------------------------------|--------|
| Is the pizza vegetarian? | Yes    | ↔        | Is there any meat on the pizza? | No     |

Ans. None: No 🚨  
 Ans. SQuINT: No 🚨  
 Ans. CP-VQA: No 🚨  
 Ans. Ours: Yes

Ans. None: No  
 Ans. SQuINT: No  
 Ans. CP-VQA: No  
 Ans. Ours: No

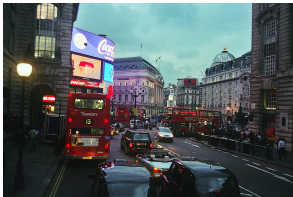

Ground Truth

| Question 1             | Ans. 1 | Relation | Question 2                               | Ans. 2 |
|------------------------|--------|----------|------------------------------------------|--------|
| Is this a busy street? | Yes    | ↔        | Is there a lot of traffic on the street? | Yes    |

Ans. None: Yes  
 Ans. SQuINT: Yes  
 Ans. CP-VQA: Yes  
 Ans. Ours: Yes

Ans. None: Yes  
 Ans. SQuINT: No 🚨  
 Ans. CP-VQA: Yes  
 Ans. Ours: Yes

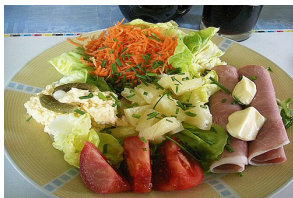

Ground Truth

| Question 1          | Ans. 1 | Relation | Question 2                  | Ans. 2 |
|---------------------|--------|----------|-----------------------------|--------|
| Is this meal vegan? | No     | ←        | Is there meat on the plate? | Yes    |

Ans. None: No  
 Ans. SQuINT: No  
 Ans. CP-VQA: No  
 Ans. Ours: Yes 🚨

Ans. None: Yes  
 Ans. SQuINT: Yes  
 Ans. CP-VQA: Yes  
 Ans. Ours: Yes

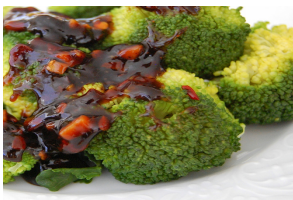

Ground Truth

| Question 1            | Ans. 1 | Relation | Question 2     | Ans. 2 |
|-----------------------|--------|----------|----------------|--------|
| Is this a vegan dish? | Yes    | →        | Is there meat? | No     |

Ans. None: Yes  
 Ans. SQuINT: Yes  
 Ans. CP-VQA: Yes  
 Ans. Ours: Yes

Ans. None: Yes 🚨  
 Ans. SQuINT: No  
 Ans. CP-VQA: No  
 Ans. Ours: No

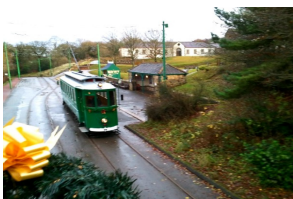

Ground Truth

| Question 1          | Ans. 1 | Relation | Question 2         | Ans. 2 |
|---------------------|--------|----------|--------------------|--------|
| Is the ground damp? | Yes    | ↔        | Is the ground wet? | Yes    |

Ans. None: Yes  
 Ans. SQuINT: No 🚨  
 Ans. CP-VQA: No 🚨  
 Ans. Ours: No 🚨

Ans. None: Yes  
 Ans. SQuINT: Yes  
 Ans. CP-VQA: Yes  
 Ans. Ours: Yes

Figure 2. Additional qualitative examples from the Introspect dataset using BAN as backbone. Red siren symbols indicate inconsistent cases.

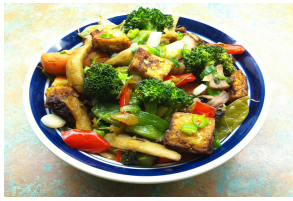

Ground Truth

| Question 1               | Ans. 1 | Relation | Question 2                     | Ans. 2 |
|--------------------------|--------|----------|--------------------------------|--------|
| Is this meal nutritious? | Yes    | →        | Is this food high in calories? | No     |

Ans. None: Yes  
 Ans. SQuINT: Yes  
 Ans. CP-VQA: Yes  
 Ans. Ours: Yes

Ans. None: Yes 🚨  
 Ans. SQuINT: Yes 🚨  
 Ans. CP-VQA: No  
 Ans. Ours: No

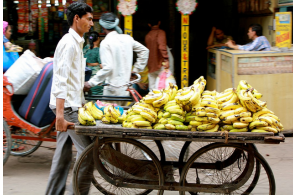

Ground Truth

| Question 1            | Ans. 1 | Relation | Question 2                         | Ans. 2 |
|-----------------------|--------|----------|------------------------------------|--------|
| Are the bananas ripe? | Yes    | ↔        | Are the bananas ready to be eaten? | Yes    |

Ans. None: Yes  
 Ans. SQuINT: No  
 Ans. CP-VQA: No  
 Ans. Ours: Yes

Ans. None: No 🚨  
 Ans. SQuINT: No  
 Ans. CP-VQA: No  
 Ans. Ours: Yes

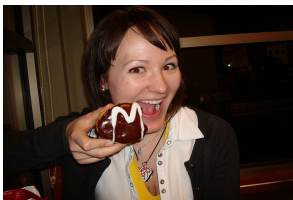

Ground Truth

| Question 1              | Ans. 1 | Relation | Question 2                     | Ans. 2 |
|-------------------------|--------|----------|--------------------------------|--------|
| Is this a sweet desert? | Yes    | ←        | Does the desert have frosting? | Yes    |

Ans. None: No 🚨  
 Ans. SQuINT: No 🚨  
 Ans. CP-VQA: No 🚨  
 Ans. Ours: Yes

Ans. None: Yes  
 Ans. SQuINT: Yes  
 Ans. CP-VQA: Yes  
 Ans. Ours: Yes

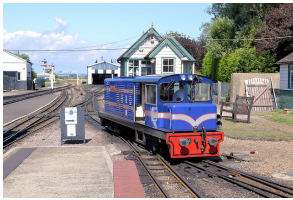

Ground Truth

| Question 1        | Ans. 1 | Relation | Question 2     | Ans. 2 |
|-------------------|--------|----------|----------------|--------|
| Is it wintertime? | No     | →        | Is there snow? | No     |

Ans. None: No  
 Ans. SQuINT: No  
 Ans. CP-VQA: No  
 Ans. Ours: No

Ans. None: Yes 🚨  
 Ans. SQuINT: No  
 Ans. CP-VQA: No  
 Ans. Ours: No

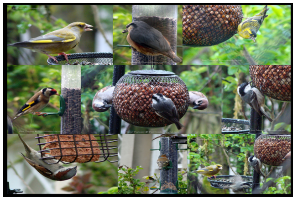

Ground Truth

| Question 1             | Ans. 1 | Relation | Question 2            | Ans. 2 |
|------------------------|--------|----------|-----------------------|--------|
| Are these birds alive? | Yes    | ←        | Are the birds eating? | Yes    |

Ans. None: Yes  
 Ans. SQuINT: Yes  
 Ans. CP-VQA: No 🚨  
 Ans. Ours: Yes

Ans. None: Yes  
 Ans. SQuINT: Yes  
 Ans. CP-VQA: Yes  
 Ans. Ours: Yes

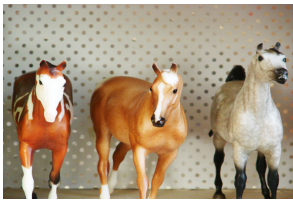

Ground Truth

| Question 1              | Ans. 1 | Relation | Question 2                           | Ans. 2 |
|-------------------------|--------|----------|--------------------------------------|--------|
| Are these animals real? | No     | ←        | Are the animals made out of plastic? | Yes    |

Ans. None: Yes 🚨  
 Ans. SQuINT: Yes 🚨  
 Ans. CP-VQA: Yes 🚨  
 Ans. Ours: No

Ans. None: Yes  
 Ans. SQuINT: Yes  
 Ans. CP-VQA: Yes  
 Ans. Ours: Yes

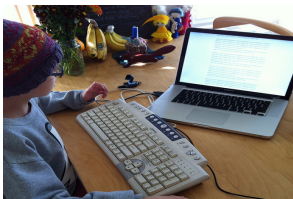

Ground Truth

| Question 1                           | Ans. 1 | Relation | Question 2              | Ans. 2 |
|--------------------------------------|--------|----------|-------------------------|--------|
| Do the girls appear to be in a home? | Yes    | →        | Is the child at school? | No     |

Ans. None: Yes  
 Ans. SQuINT: Yes  
 Ans. CP-VQA: Yes  
 Ans. Ours: Yes

Ans. None: Yes 🚨  
 Ans. SQuINT: Yes 🚨  
 Ans. CP-VQA: Yes 🚨  
 Ans. Ours: No

Figure 3. Additional qualitative examples from the Introspect dataset using BAN as backbone. Red siren symbols indicate inconsistent cases.

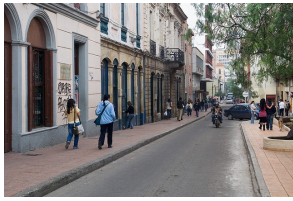

Ground Truth

| Question 1                                                | Ans. 1 | Relation | Question 2         | Ans. 2 |
|-----------------------------------------------------------|--------|----------|--------------------|--------|
| Can people walk across the streets depicted in the image? | Yes    | →        | Is there a street? | Yes    |

Ans. None: Yes  
 Ans. SQuINT: Yes  
 Ans. CP-VQA: Yes  
 Ans. Ours: Yes

Ans. None: No 🚨  
 Ans. SQuINT: No 🚨  
 Ans. CP-VQA: No 🚨  
 Ans. Ours: Yes

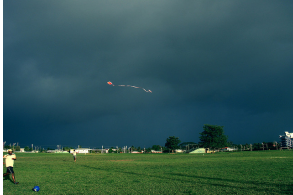

Ground Truth

| Question 1                              | Ans. 1 | Relation | Question 2          | Ans. 2 |
|-----------------------------------------|--------|----------|---------------------|--------|
| Does the weather appear to be pleasant? | No     | ←        | Are the skies dark? | Yes    |

Ans. None: Yes 🚨  
 Ans. SQuINT: Yes 🚨  
 Ans. CP-VQA: Yes 🚨  
 Ans. Ours: Yes 🚨

Ans. None: Yes  
 Ans. SQuINT: Yes  
 Ans. CP-VQA: Yes  
 Ans. Ours: Yes

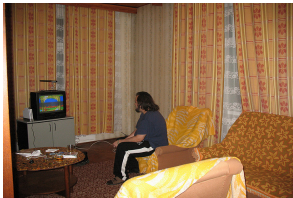

Ground Truth

| Question 1                            | Ans. 1 | Relation | Question 2                                      | Ans. 2 |
|---------------------------------------|--------|----------|-------------------------------------------------|--------|
| Is this room decorated for the 1970s? | Yes    | ↔        | Are the decorations consistent with the 1970's? | Yes    |

Ans. None: No 🚨  
 Ans. SQuINT: No 🚨  
 Ans. CP-VQA: Yes  
 Ans. Ours: Yes

Ans. None: Yes  
 Ans. SQuINT: Yes  
 Ans. CP-VQA: Yes  
 Ans. Ours: Yes

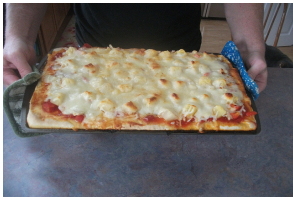

Ground Truth

| Question 1        | Ans. 1 | Relation | Question 2            | Ans. 2 |
|-------------------|--------|----------|-----------------------|--------|
| Is the pizza hot? | Yes    | ↔        | Is the cheese melted? | Yes    |

Ans. None: No 🚨  
 Ans. SQuINT: No 🚨  
 Ans. CP-VQA: No 🚨  
 Ans. Ours: Yes

Ans. None: Yes  
 Ans. SQuINT: Yes  
 Ans. CP-VQA: Yes  
 Ans. Ours: Yes

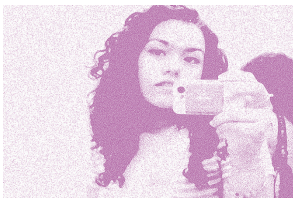

Ground Truth

| Question 1                    | Ans. 1 | Relation | Question 2                     | Ans. 2 |
|-------------------------------|--------|----------|--------------------------------|--------|
| Is the woman taking a selfie? | Yes    | →        | Is the woman holding a camera? | Yes    |

Ans. None: Yes  
 Ans. SQuINT: Yes  
 Ans. CP-VQA: Yes  
 Ans. Ours: Yes

Ans. None: No 🚨  
 Ans. SQuINT: Yes  
 Ans. CP-VQA: No 🚨  
 Ans. Ours: Yes

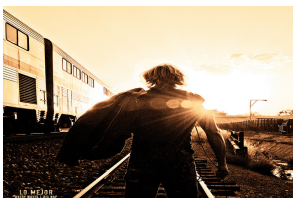

Ground Truth

| Question 1            | Ans. 1 | Relation | Question 2             | Ans. 2 |
|-----------------------|--------|----------|------------------------|--------|
| Is the picture sepia? | Yes    | →        | Is the photo colorful? | No     |

Ans. None: Yes  
 Ans. SQuINT: Yes  
 Ans. CP-VQA: Yes  
 Ans. Ours: Yes

Ans. None: Yes 🚨  
 Ans. SQuINT: Yes 🚨  
 Ans. CP-VQA: Yes 🚨  
 Ans. Ours: Yes 🚨

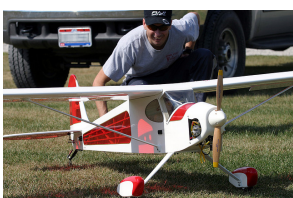

Ground Truth

| Question 1                  | Ans. 1 | Relation | Question 2                            | Ans. 2 |
|-----------------------------|--------|----------|---------------------------------------|--------|
| Can you ride this airplane? | No     | ←        | Is the airplane smaller than the man? | Yes    |

Ans. None: Yes 🚨  
 Ans. SQuINT: Yes 🚨  
 Ans. CP-VQA: Yes 🚨  
 Ans. Ours: No

Ans. None: Yes  
 Ans. SQuINT: Yes  
 Ans. CP-VQA: Yes  
 Ans. Ours: Yes

Figure 4. Additional qualitative examples from the Introspect dataset using BAN as backbone. Red siren symbols indicate inconsistent cases.

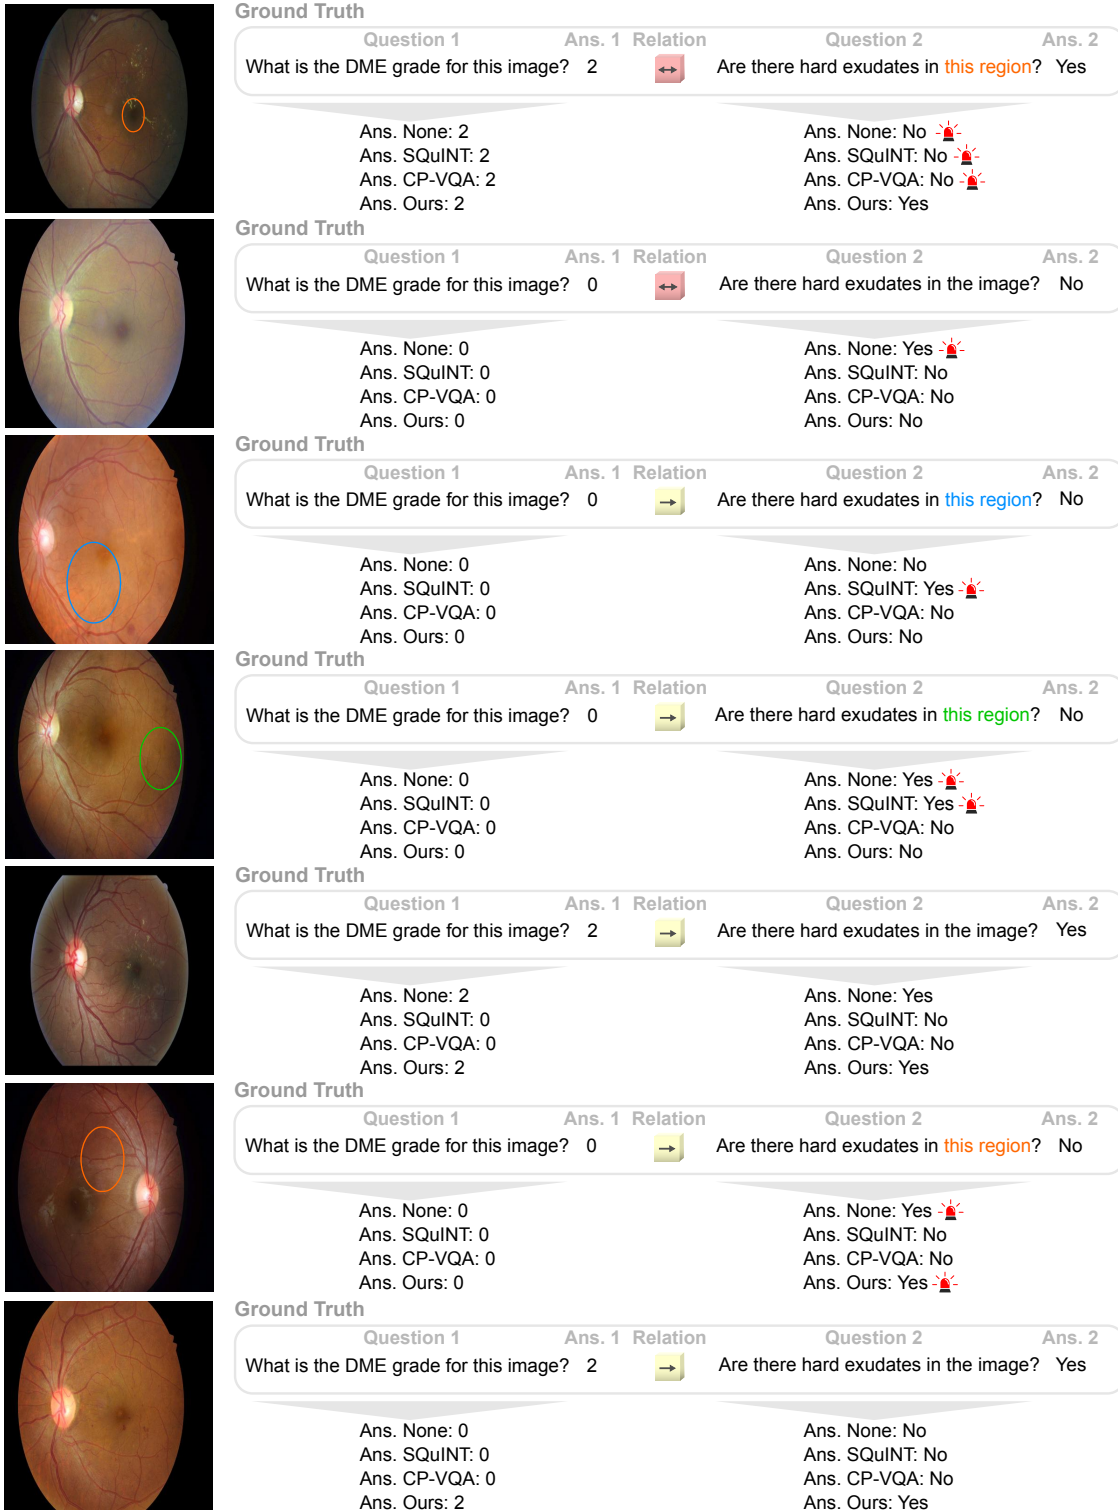

Figure 5. Additional qualitative examples from the DME dataset using MVQA as backbone. Red siren symbols indicate inconsistent cases. DME is a disease that is staged into grades (0, 1 or 2), which depend on the number of visual pathological features of the retina.

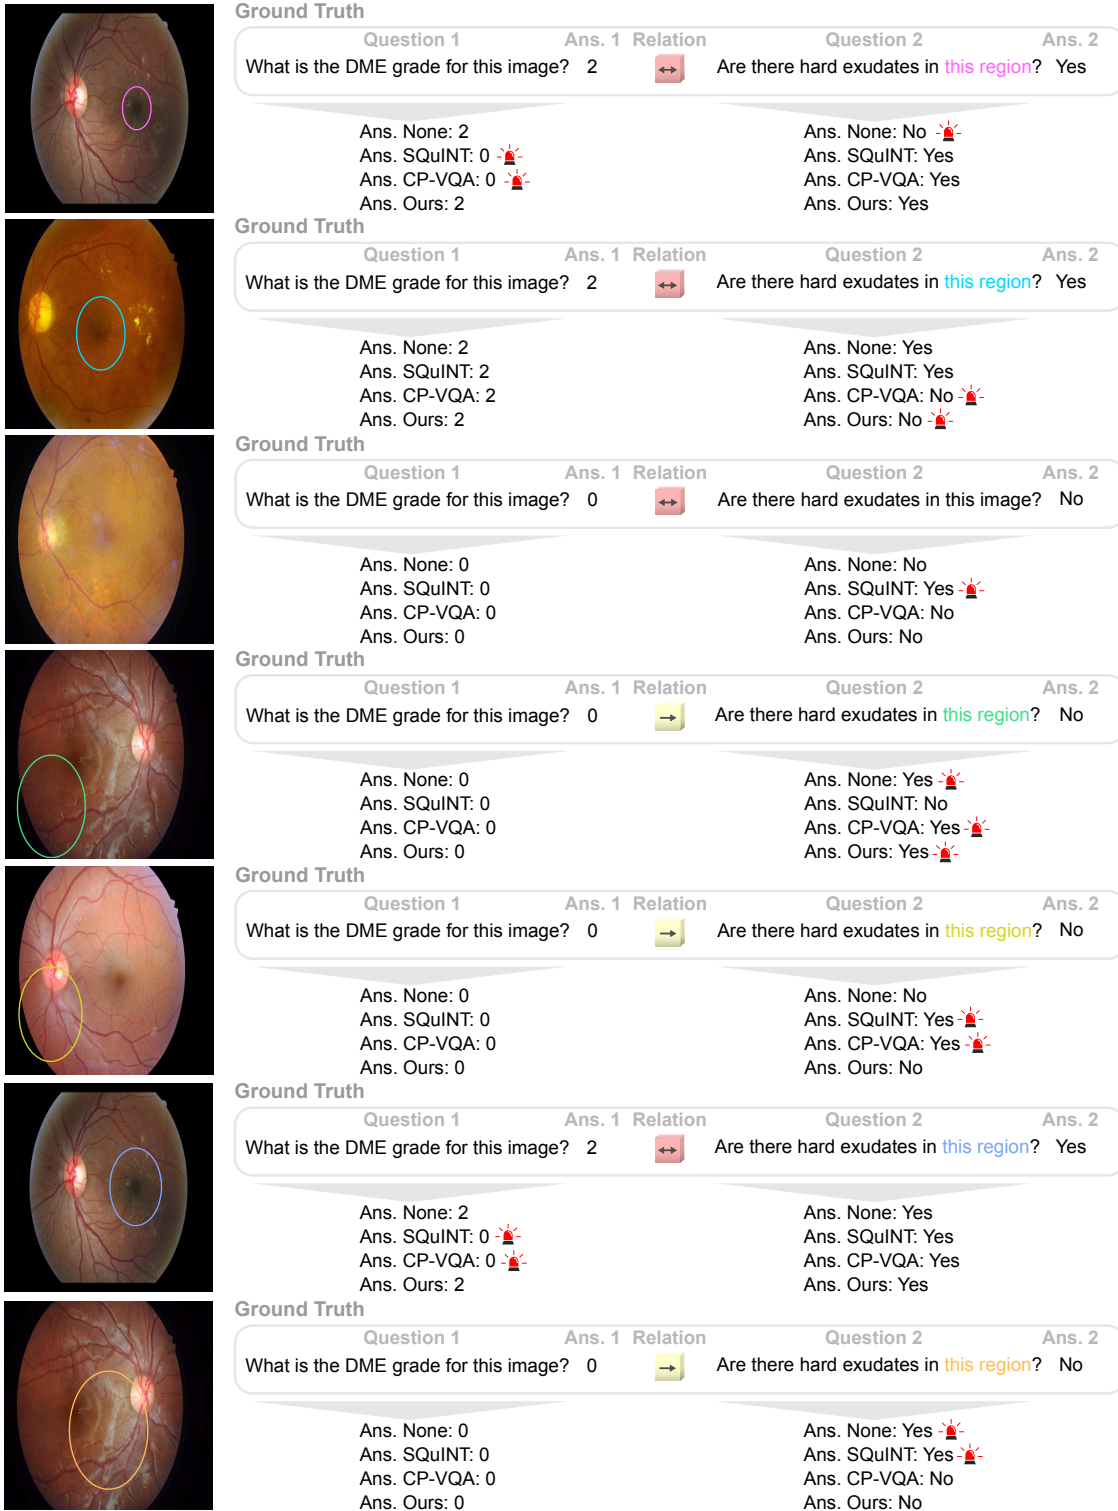

Figure 6. Additional qualitative examples from the DME dataset using MVQA as backbone. Red siren symbols indicate inconsistent cases. DME is a disease that is staged into grades (0, 1 or 2), which depend on the number of visual pathological features of the retina.
